# Supplementary figures and images for: Biotechnological Production and Characterization of Extracellular Melanin by Streptomyces nashvillensis
Source: MDPI journal article supplement (doi:10.3390/microorganisms12020297), 2024-01-30

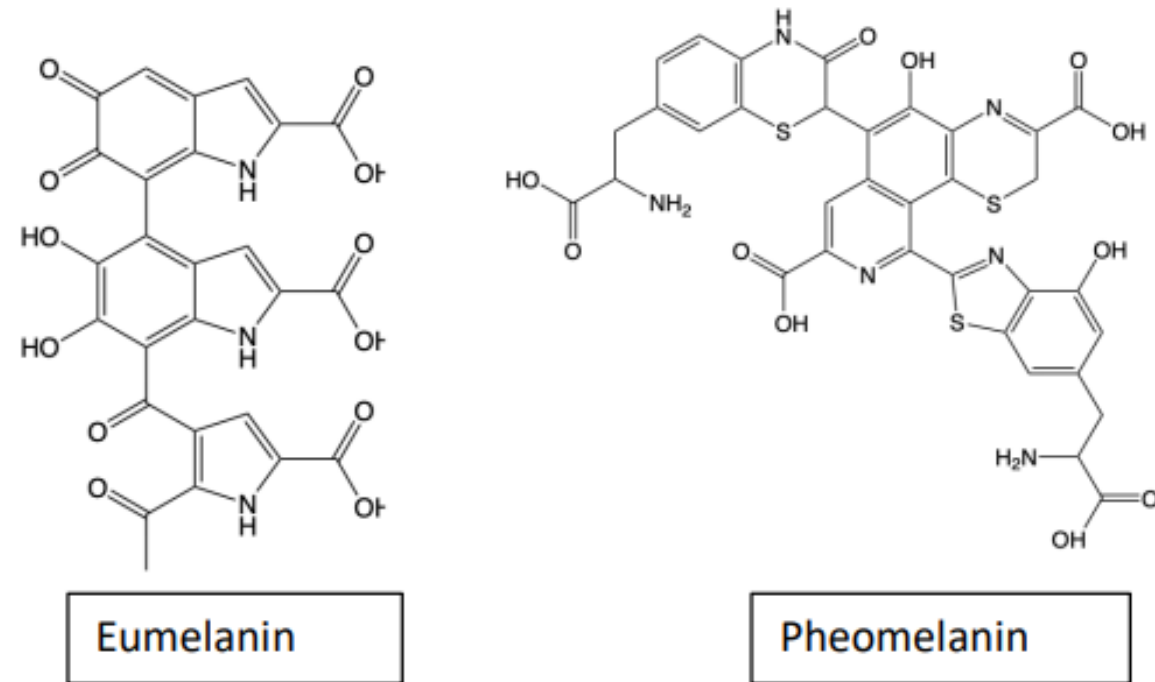

**Figure S1.** Structures of different types of melanin produced by *Streptomyces* strains.

Supplement: s1 [file s1]
